# Supplementary material for: Polymeric capsule-cushioned leukocyte cell membrane vesicles as a biomimetic delivery platform
Source: Royal Society of Chemistry journal article supplement (doi:10.1039/c5nr08407e), 2016-01-01
Supplement: c5nr08407e1.pdf [file c5nr08407e1.pdf]

## **Supporting Information**

### **Polymeric Capsule-Cushioned Leukocyte Cell Membrane Vesicles as a Biomimetic Delivery Platform**

Changyong Gao, Zhiguang Wu, Zihua Lin, Xiankun Lin, and Qiang He\*

State Key Laboratory of Robotics and System (HIT), Micro/Nanotechnology  
Research Center, Harbin Institute of Technology, Yikuangjie 2, Harbin 150080, China

**Fig. S1**

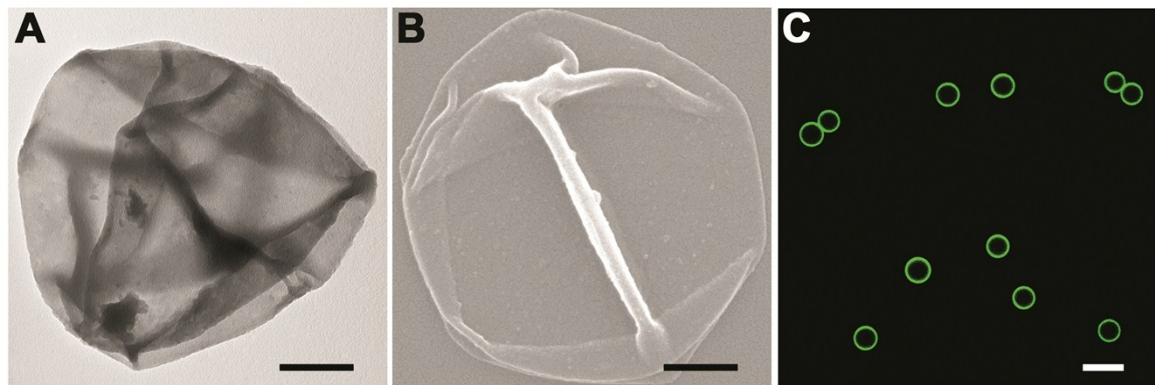

**Fig. S1** Characterization of the capsules. (A) TEM image, (B) SEM image, (C) CLSM image of FITC-capsules. Scale bar = 500 nm (A, B) and 5  $\mu$ m (C).

**Fig. S2**

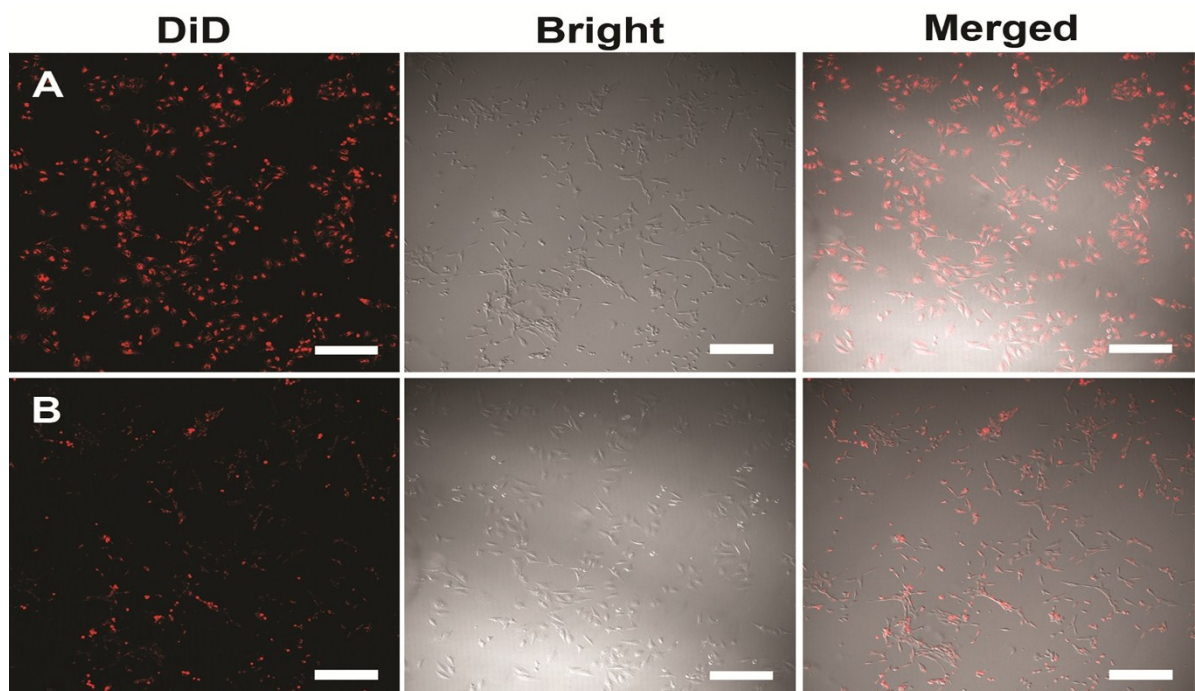

**Fig. S2** J774 cells binding ability. (A) HeLa cells. (B) L02 cells. Scale bar = 250  $\mu$ m.
